1  
2  
3  
4  
5  
6  
7  
8  
9  
10  
11  
12  
13  
14  
15  
16  
17  
18  
19  
20  
21  
22  
23  
24  
25  
26  
27  
28  
29  
30  
31  
32  
33  
34  
35  
36  
37

**Title:** Evidence of adaptive host and vector manipulation by plant viruses revealed through combined meta-analysis and modeling approaches.

**Authors:**

Quentin Chesnais<sup>1</sup>, Christie A. Bahlai<sup>2</sup>, Angela Peace<sup>3</sup>, David W. Crowder<sup>4</sup>, Nilsa A. Bosque-Pérez<sup>5</sup>, Kerry Mauck<sup>1\*</sup>

\*corresponding author

**Affiliations:**

1. Department of Entomology, University of California, Riverside, Riverside, CA 92521, USA

2. Department of Biological Sciences, Kent State University, Kent, Ohio, USA, 44242

3. Department of Mathematics and Statistics, Texas Tech University, Lubbock, TX, USA, 79409

4. Department of Entomology, Washington State University, Pullman, WA, USA 99164

5. Department of Entomology, Plant Pathology and Nematology, University of Idaho, Moscow, Idaho, USA 83844-2329

**Keywords:** Disease ecology - Host phenotype alteration - Parasite manipulation - Plant-mediated interactions - Vector behavior - Virus evolution - Meta-analysis

38 **Abstract:**

39 A growing number of studies indicate that plant viruses enhance their own transmission by  
40 modifying host phenotypes and vector behavior, leading to the hypothesis that such effects  
41 are manipulations resulting from virus adaptations. However, few studies have linked  
42 putative manipulations with virus components, and the true frequency and magnitude of host  
43 and vector manipulation across virus taxa remains unknown. To address this knowledge gap,  
44 we performed a meta-analysis to quantify convergence in virus effects on hosts and vectors  
45 across taxonomic groups that share transmission mechanism traits, and thereby stand to  
46 benefit from similar sequences of vector behavior. We then combined meta-analysis outputs  
47 with an epidemiological model to assess consequences of manipulation for virus spread.  
48 Overall, transmission mechanism traits strongly predicted the magnitude and nature of virus  
49 effects on vector preferences and performance. Models parameterized with meta-analysis  
50 data demonstrate that manipulation effects enhance virus spread, and that viruses with long  
51 acquisition times and retention durations are under strong selection pressure to manipulate  
52 transmission. By combining meta-analysis with epidemiological modeling, our results confirm  
53 that host and vector manipulation are important aspects of plant virus ecology and evolution  
54 while emphasizing the need to incorporate more pathosystems and transmission mechanism  
55 traits in future studies.

56

## 57 **Introduction**

58 Arthropod-borne plant viruses are ubiquitous, obligate biotrophic parasites. To exploit hosts,  
59 plant viruses have evolved adaptations for suppressing host immunity, co-opting host  
60 resources for reproduction, and augmenting vascular connections to enable systemic  
61 movement of virus particles (Pazhouhandeh *et al.* 2006; Patarroyo *et al.* 2012; Rojas *et al.*  
62 2016; Yang & Li 2018). The host physiological changes that result (symptoms), and the virus  
63 genes underlying their expression, are studied primarily because of their economically  
64 important effects on plant health. However, symptoms of infection can also affect interactions  
65 with arthropod vectors via changes in plant cues mediating host seeking and feeding  
66 behaviors, particularly visual characteristics (color, size, shape), odor profiles, palatability,  
67 defense chemistry, and nutritional quality (Ngumbi *et al.* 2007; Mauck *et al.* 2014a, b, 2018;  
68 Casteel *et al.* 2015; Peñaflor *et al.* 2016); reviewed in (Mauck *et al.* 2018). The importance of  
69 vector behavior for virus fitness has led to the hypothesis that viruses might evolve  
70 adaptations for eliciting specific symptoms (host phenotypes) that increase transmission-  
71 conducive interactions between arthropod vectors and infected hosts.

72

73 There are now over 120 published studies that test this hypothesis using combinations of  
74 behavioral and biological assays, as well as techniques for plant phenotyping. Many report  
75 virus effects on host phenotypes and vector behavior that appear to be cases of adaptive  
76 host manipulation - an instance of a parasite evolving to control elements of its host's  
77 phenotype that help maintain or enhance rates of transmission (Poulin 2010). However,  
78 despite the growing number of studies on plant virus manipulation of hosts and vectors, we  
79 lack a quantitative synthesis of how host phenotypes vary depending on the traits of the viral  
80 pathogens under study, including transmission mechanism traits that govern how viruses are  
81 acquired, retained, and inoculated by arthropod vectors (Nault 1997; Ng & Falk 2006;  
82 Hogenhout *et al.* 2008; Ng & Zhou 2015). This limits our ability to determine whether putative  
83 instances of vector manipulation by plant viruses are a result of virus adaptations, or simply  
84 by-products of pathology (Thomas *et al.* 2005). For example, if putative manipulations are  
85 the product of adaptations, viruses transmitted via the same sequences of vector behavior  
86 may exhibit convergence in their effects on plant cues mediating vector-host interactions that  
87 lead to efficient transmission (Thomas *et al.* 2005; Mauck *et al.* 2010, 2016). Additionally, a  
88 lack of synthesis around virus traits creates a disconnect between the emerging evidence for  
89 virus manipulation and other historically rooted fields, including epidemiology, molecular  
90 virology, and virus ecology (Malmstrom *et al.* 2011; Alexander *et al.* 2014). As a result, the  
91 true frequency and relevance of host manipulation by plant viruses remains unknown.

92

93 To address these knowledge gaps, we combined a meta-analysis with mathematical  
94 modeling and a review of taxon-specific virus-vector relationships to evaluate the case for  
95 plant virus manipulation of hosts and vectors in the context of virus traits underlying the  
96 transmission process. We used traits shared by phylogenetically divergent virus lineages,  
97 namely infection location in the plant and retention mechanism in the vector, as a framework  
98 for evaluating evidence for or against adaptive host manipulation. Within this framework, we  
99 quantified the magnitude and direction of virus effects on host plant attractiveness,  
100 palatability, and quality to arthropod vectors. We also derived parameter estimates from  
101 these data and incorporated them into a model that was explicitly designed to explore virus  
102 effects on host-vector relationships in the context of virus traits (Shaw *et al.* 2017). Finally,  
103 we interpreted our results in the context of documented virus-vector relationships that  
104 influence the ecology of the major virus lineages targeted in our study.

105

### 106 ***Predictions based on virus traits***

107 Empirical studies of plant viruses inducing manipulations of hosts and vectors assess vector  
108 preferences and performance on infected and non-infected plants as proxies to understand  
109 how virus effects on host phenotypes influence transmission. When evaluated across diverse  
110 pathosystems, these experiments can serve as an important tool for exploring the adaptive  
111 significance of virus effects on host phenotypes (Thomas *et al.* 2005; Mauck *et al.* 2016).  
112 Phylogenetically unrelated plant viruses may exhibit convergence in their effects on host  
113 phenotypes based on shared virus traits; specifically, requirements for vectors to engage in a  
114 narrow suite of behaviors necessary for transmission. Similar convergence in manipulation  
115 strategies is apparent across diverse lineages of animal-infecting parasites transmitted by  
116 blood-feeding vectors (Thomas *et al.* 2005; Lefèvre & Thomas 2008), supporting the  
117 hypothesis that such effects are adaptive. This evidence is essential for understanding  
118 manipulation because many of these parasites and their hosts are intractable for functional  
119 genomics work to identify genes, and gene targets that may underlie adaptive manipulation  
120 (Heil 2016). Convergence of virus effects in the absence of phylogenetic relatedness  
121 provides indirect evidence in support of particular effects being the product of virus  
122 adaptations rather than by-products of pathology (Thomas *et al.* 2005; Mauck *et al.* 2018).

123

124 Here, we used virus traits associated with transmission as a framework for quantifying the  
125 adaptive significance of virus effects on host phenotypes using meta-analysis. Viruses can  
126 be broadly classified based on the types and durations of vector probing and feeding  
127 behaviors required for virion acquisition from, and inoculation to, the host  
128 (acquisition/inoculation site) (Brault *et al.* 2010) and the persistence of virions in the vector  
129 (retention mechanism) (Fig. 1). Phloem-limited (**PL**) viruses are restricted to the host

130 vascular tissue, whereby acquisition of sufficient virions for transmission depends on vectors  
131 engaging in sustained phloem sap ingestion for hours or days (Hogenhout *et al.* 2008; Brault  
132 *et al.* 2010). Following acquisition, most PL viruses are retained in the vector for several days  
133 (non-circulative, semi-persistent [**NCSP**] viruses) or the duration of the vector's lifespan  
134 (circulative, persistent viruses), and can be inoculated to multiple hosts without re-  
135 acquisition. Within the circulative, persistently-transmitted retention mechanism, some  
136 viruses traverse the gut barrier and hemolymph to colonize the salivary glands (circulative  
137 persistent, non-propagative [**CPNPr**]), while others colonize and replicate in various vector  
138 tissues, effectively using the vector as a second host (circulative persistent, propagative  
139 [**CPPr**]) (Hogenhout *et al.* 2008). For both CPNPr and CPPr retention mechanisms, as long  
140 as the vector survives and periodically moves among hosts, a single acquisition event can  
141 lead to multiple new infections.

142

143 In contrast, most non-phloem-limited (**NPL**) viruses are acquired and inoculated following  
144 brief probes of non-vascular tissues such as epidermal or mesophyll cells (Martin *et al.* 1997;  
145 Ng & Falk 2006). These non-circulative, non-persistent (**NCNP**) viruses account for  
146 approximately 40% of all known vector-borne plant viruses, and are retained for very short  
147 periods of time following acquisition, which limits inoculation potential for a viruliferous vector  
148 (a vector carrying the virus and capable of transmitting) to about 1-2 plants (Nault 1997;  
149 Hogenhout *et al.* 2008). NPL-NCNP viruses are also rapidly lost from vector mouthparts. As  
150 a result, the spread of most NPL viruses is favored by rapid dispersal of vectors from infected  
151 to receptive hosts (Martin *et al.* 1997; Wang & Ghabrial 2002; Nault 1997; Hogenhout *et al.*  
152 2008; Martin *et al.* 1997; Wang & Ghabrial 2002).

153

154 The clear delineations of host infection location (PL vs. NPL) and retention mechanism in the  
155 vector (NCSP, CPNPr, CPPr and NCNP) provide a convenient framework for evaluating the  
156 adaptive significance of host and vector manipulation by plant viruses. Here, we applied this  
157 framework to quantify the effects of plant virus infection on three responses: (i) vector  
158 orientation preferences (host selection), (ii) vector settling/feeding behavior, and (iii) vector  
159 performance. We predicted that viruses from all trait groups should induce host phenotypic  
160 changes that result in vector orientation preferences for infected hosts over healthy ones  
161 because this increases vector contacts (Fig. 1). We further predicted that enhancements to  
162 vector settling/feeding and performance would only be apparent for trait groups that stand to  
163 benefit from sustained phloem sap ingestion and production of offspring that will remain  
164 viruliferous for long periods following virus acquisition (Fig. 1). We tested these predictions  
165 using a meta-analysis of 126 published studies covering 59 viruses belonging to 11 families,  
166 studied in association with host plants of 15 different families. Results were interpreted in the

167 context of complementary model simulations and additional ecological dimensions known to  
 168 affect virus transmission by insect vectors.  
 169

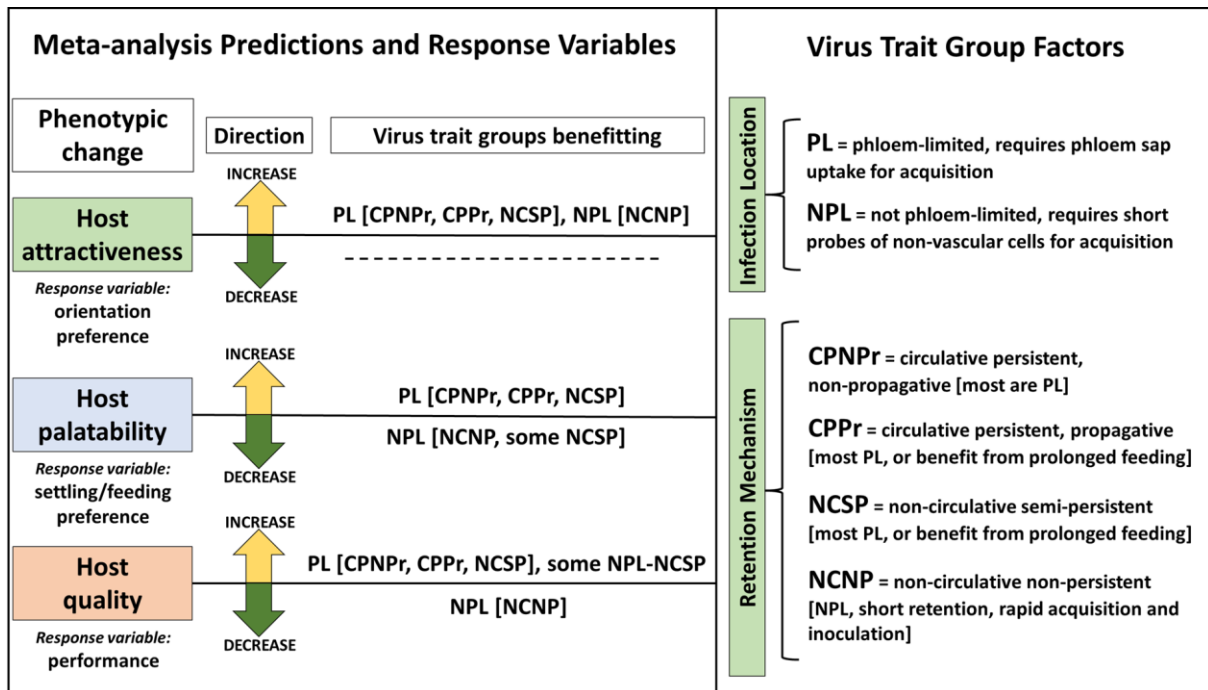

170  
 171 **Figure 1:** Predictions, response variables, and factors included in the meta-analysis.  
 172

173

174 **Materials and Methods**

175

176 **Database assembly**

177 To obtain studies related to virus–host–vector interactions, we conducted an extensive  
 178 literature search in the ISI Web of Knowledge database and Google Scholar following  
 179 (Mauck *et al.* 2012). We used a combination of broad search terms including “virus-host-  
 180 vector interactions”, “plant virus”, “insect vector”, “non-persistently transmitted virus”,  
 181 “persistent-circulative virus”, “persistent-propagative virus”, “plant virus chemical ecology”,  
 182 “vector behavior”, and “vector performance” along with specific search terms (family and  
 183 species names of viruses and their vectors) to identify studies that assesses insect vector  
 184 attraction, settling and feeding, and performance in relation to infected and non-infected  
 185 plants. We also surveyed references in review articles about virus–host–vector interactions  
 186 (Fereres & Moreno 2009; Mauck *et al.* 2010, 2012, 2018; Bosque-Pérez & Eigenbrode 2011;  
 187 Eigenbrode & Bosque-Perez 2016; Eigenbrode *et al.* 2018). Complete criteria for study  
 188 inclusion and data selection, the assembled database, and a complete list of references are  
 189 provided in the electronic supplementary material (ESM\_meta-analysis.docx). Data were  
 190 obtained from tables, or extracted from plots using Plot Digitizer (Huwaldt & Steinhorst 2013).

191 To avoid bias and use all the available data, we recorded multiple data points from a single  
192 study if it examined more than one relevant response variable or included multiple host  
193 plants, viruses, or vectors.

194

195 For each non-infected/infected plant comparison, we recorded the mean, standard deviation  
196 and sample size of the relevant response variable measuring either vector orientation  
197 preference, settling/feeding behavior, or performance. Orientation preference was defined as  
198 any vector response to plant cues without physical contact with the plant, such as studies  
199 that used olfactometers. Settling/feeding preference was defined as any behavioral response  
200 to the plants that occurred following host contact, such as settling preference, retention time  
201 on a host, and time to dispersal as well as feeding behaviors (electrical penetration graph  
202 technique or other metrics that quantify ease of feeding on preferred tissues). Vector  
203 performance was defined as any physiological response to plants known to affect vector  
204 reproduction and/or longevity at the individual or colony level (development time, survival,  
205 fecundity, weight, population growth).

206

207 We also documented variables related to virus traits (Fig. 1). These included traits  
208 associated with transmission (infection location in the plant and retention mechanism in the  
209 vector). The retention mechanism for persistent viruses also includes circulation and  
210 colonization of the vector (CPNPr), as well as propagation within vectors for a subset of  
211 these pathogens (CPPr). Thus, we also considered these virus traits by separating these two  
212 retention mechanisms in the analysis. For the analysis by virus family, we included families  
213 for which there were at least three independent measures of vector behaviors or  
214 performance (ESM\_meta-analysis.docx for complete analyses, table S2abc). The full  
215 database is available as part of the electronic supplementary data (ESM\_Meta-analysis  
216 database.xlsx).

217

### 218 ***Effect size calculation***

219 For each non-infected/infected plant comparison in the database, we calculated the virus  
220 infection effect size using the Hedges'  $g$  metric and its confidence interval (CI) (Hedges  
221 1981). The metric is calculated as  $g = [(X_i - X_h)/s] J$ , where  $X_i$  represents the mean of  
222 the vector parameter on the infected plant,  $X_h$  represents the mean of the vector parameter  
223 on the non-infected plant,  $s$  represents the pooled standard deviation, and  $J$  is a correction  
224 factor for small sample size (Koricheva *et al.* 2013). Positive Hedges'  $g$  values indicate that  
225 the vector preferred or performed better on infected compared to non-infected plants,  
226 whereas negative values indicate they preferred or performed better on non-infected plants.  
227 When necessary we reversed the sign of the effect size so that a negative value of  $g$  always



228 indicates a negative effect of virus infection; for example, decreased development time on  
229 infected plants represents increased rather than decreased performance. The Hedges'  $g$  and  
230 its estimated sampling variance were calculated using the 'escalc' function in the 'metafor'  
231 package in R 3.6.0 (Viechtbauer 2010).

232

### 233 **Meta-analysis model construction**

234 We fit multilevel mixed-effects models using the 'rma.mv' function in the R package *metafor*  
235 that weighted each effect size by the inverse of its sampling variance plus the amount of  
236 residual heterogeneity not explained by moderators (i.e., additional variables that help us  
237 understand the relationships between the dependent and independent variables)  
238 (Viechtbauer 2010). To account for the non-independence of data derived from the same  
239 paper, we assigned each study case a single identifier (Study ID), corresponding to a single  
240 published paper retained in our analysis. We included the study ID as a random effect term  
241 in all models.

242

### 243 **Hypothesis testing and meta-regression**

244 To address whether virus infection impacted vector orientation preference, settling/feeding  
245 behaviors, and vector performance, we fit random-effects models separately to the vector  
246 orientation preference data, vector settling/feeding data, and vector performance data using  
247 restricted maximum likelihood (REML). We considered model-estimated mean effect sizes  
248 with 95% confidence intervals (CIs) that did not cross zero as evidence for a significant  
249 effect.

250

251 Initially, we calculated a mean effect size across all studies to assess whether there was an  
252 overall effect of plant infection on vector parameters. Second, we tested how various  
253 moderators influenced the magnitude of the virus infection effect using meta-regression  
254 models conducted separately for each moderator. When significant effects were detected for  
255 moderators with more than two groups, the meta-analysis was followed by post-hoc  
256 comparisons among groups, carried out using the *multcomp* package in R (Hothorn *et al.*  
257 2008). To assess whether there was a significant effect of virus infection for each group, we  
258 re-fitted models with no intercepts and the model coefficients and their associated CIs were  
259 used to determine whether the effect size was different from zero for each group.

260

### 261 **Heterogeneity statistics and bias analysis**

262 For each mixed-effects model, we assessed residual heterogeneity using the QE statistic  
263 (Viechtbauer 2010; Koricheva *et al.* 2013). We found significant QE values for all models ( $P$   
264  $< .0001$ , ESM\_meta-analysis.docx, table S1), suggesting there were important moderators



265 that we did not include in analyses. To assess the potential for publication bias to influence  
266 our conclusions, we used funnel plots and meta-regression models with “study year” and  
267 “plant domestication” as moderators (Koricheva *et al.* 2013). We found a low probability that  
268 publication bias affected our results (ESM\_meta-analysis.docx, figures S1, S2 and S3),  
269 except that the effect size on vector performance is significantly higher on wild plants than  
270 cultivated ( $P = .0003$ , ESM\_meta-analysis.docx, table S1, figure S3). The fail-safe numbers  
271 for plant virus infection (overall effects) were also calculated for each dataset. Fail-safe  
272 numbers indicate the number of nonsignificant unpublished or missing studies that would  
273 negate the results, and are considered robust against publication bias if they are  $> 5n + 10$   
274 where  $n$  is number of studies (Rosenthal 1979).

275

### 276 ***Modeling implications for virus spread***

277 The data assembled for the meta-analysis provided an opportunity to leverage information on  
278 effect sizes to assess how virus-induced manipulation of hosts and vectors may affect the  
279 rate of transmission. To accomplish this, we used a published model (Shaw *et al.* 2017) that  
280 was constructed to accommodate a comparison of aphid-transmitted viruses with a phloem-  
281 limited, CPNPr infection/retention mechanism and a non-phloem-limited NCNP  
282 infection/retention mechanism (see electronic supplementary material file ESM\_model  
283 parameters.docx). These categories capture the characteristics of most pathosystems in our  
284 meta-analysis (ESM\_Meta-analysis database.xlsx). We modified the model in several ways  
285 to complement the meta-analysis outputs and data. Briefly, these modifications included (1)  
286 substitution of new parameters for virus effects (vector orientation preference for infected  
287 hosts [ $\delta$ ] [attraction], maximum vector departure rate from infected hosts [ $a_i$ ] [settling and  
288 feeding], and intrinsic vector growth rate on infected hosts [ $r_i$ ] [performance]); (2) modification  
289 of parameter values for dispersal loss ( $\mu$ ) and the rate at which vectors become viruliferous  
290 ( $\beta_v$ ) based on values in additional published literature; and (3) changing the vector recovery  
291 rate term ( $\gamma$ ) to more accurately represent PL-CPNPr and NPL-NCNP transmission  
292 mechanisms. Table 1 shows a summary of the model parameters, values and confidence  
293 intervals used here, and a full description of model and parameter modifications is provided  
294 in the supplementary material (ESM\_model parameters.docx).

295

296

297

298

299

300

301

302 **Table 1.** Model parameters (adapted from Shaw *et al.* 2017).

| Parameters                                                                                        | PL-CPNPr  |       |               | NPL-NCNP  |       |               |
|---------------------------------------------------------------------------------------------------|-----------|-------|---------------|-----------|-------|---------------|
|                                                                                                   | Values    | SD    | (Cl.lb-CI.ub) | Values    | SD    | (Cl.lb-CI.ub) |
| $r_h$ intrinsic vector growth rate on healthy hosts ( $n = 38$ )                                  | 0.259     | 0.066 |               | 0.259     | 0.066 |               |
| $r_i$ intrinsic vector growth rate on infected hosts                                              | 0.288     |       | (0.272-0.305) | 0.254     |       | (0.237-0.272) |
| $K_h$ vector carrying capacity on healthy hosts                                                   | 100       |       |               | 100       |       |               |
| $K_i$ vector carrying capacity on infected hosts                                                  | 100       |       |               | 100       |       |               |
| $F$ field density                                                                                 | 4 (2.5-5) |       |               | 4 (2.5-5) |       |               |
| $\xi$ minimum host/ha needed to support the vectors                                               | 0.01F     |       |               | 0.01F     |       |               |
| $a_h$ maximum vector departure rate from healthy hosts ( $n = 32$ )                               | 0.423     | 0.217 |               | 0.423     | 0.217 |               |
| $a_i$ maximum vector departure rate from infected hosts                                           | 0.243     |       | (0.163-0.324) | 0.347     |       | (0.265-0.428) |
| $c_1$ same status half-departure constant                                                         | 13.76     |       |               | 13.76     |       |               |
| $c_2$ different status half-departure constant                                                    | 0.3       |       |               | 0.3       |       |               |
| $\delta$ preference of nonvirulent vectors for settling on healthy hosts                          | 0.782     | 0.196 |               | 0.719     | 0.063 |               |
| $\mathcal{E}$ preference of virulent vectors for settling on infected hosts ( <i>Main Model</i> ) | 1.218     | 0.196 | (1.022-1.414) | 1.281     | 0.063 | (1.218-1.344) |
| $\mathcal{E}$ preference of virulent vectors for settling on infected hosts ( <i>Model 2</i> )    | 1         |       | (0.804-1.196) | 1         |       | (0.937-1.063) |
| $\mathcal{E}$ preference of virulent vectors for settling on infected hosts ( <i>Model 3</i> )    | 0.782     | 0.196 | (0.586-0.978) | 0.719     | 0.063 | (0.656-0.782) |
| $\mu$ dispersal loss                                                                              | 53.67     | 21.39 |               | 53.67     | 21.39 |               |
| $\beta_v$ rate vector on infected host becomes virulent                                           | 0.543     | 0.14  |               | 0.215     | 0.224 | (0.008-0.457) |
| $\beta_i$ rate healthy hosts become infected                                                      | 1         |       |               | 0.182     |       |               |
| $\gamma$ vector recovery rate by feeding                                                          | 0         |       |               | 1         |       |               |

303

304

305 The model explores the preference and performance of vectors before (non-viruliferous) and  
 306 after acquiring a virus (viruliferous). It tracks the number of viruliferous (V) and non-  
 307 viruliferous (N) vectors, and the fraction of healthy (H) and infected (I) hosts using a system  
 308 of ordinary differential equations. To incorporate behavioral preferences, the model tracks  
 309 the infection status of the host that each vector is on. There are four compartments for the  
 310 vector population:  $N_h$  number of non-viruliferous vectors on healthy hosts,  $N_i$  number of non-  
 311 viruliferous vectors on infected hosts,  $V_h$  number of viruliferous vectors on healthy hosts, and  
 312  $V_i$  number of viruliferous vectors on infected hosts. The modified model equations are shown  
 313 in Table 2.

314

315

316

317

318

319 **Table 2.** Model equations.

| Vector equations                                                                                                                                                                                                                                                                                                                                                                                                                                                |                                                                                                                                           |
|-----------------------------------------------------------------------------------------------------------------------------------------------------------------------------------------------------------------------------------------------------------------------------------------------------------------------------------------------------------------------------------------------------------------------------------------------------------------|-------------------------------------------------------------------------------------------------------------------------------------------|
| $\frac{dN_h}{dt} = \underbrace{r_h[N_h + V_h] \left[ 1 - \frac{N_h + V_h}{K_h HF} \right]}_{\text{growth rate}} - \underbrace{\alpha_{nh} N_h [1 - \mu] I^\delta}_{\text{move to I}} - \underbrace{\alpha_{nh} N_h \mu}_{\text{loss dispersal}} + \underbrace{\alpha_{ni} N_i [1 - \mu] [1 - I^\delta]}_{\text{move to H}} - \underbrace{\beta_i \rho_{vh} N_h}_{\text{host infect}}$                                                                           |                                                                                                                                           |
| $\frac{dN_i}{dt} = \underbrace{\alpha_{nh} N_h [1 - \mu] I^\delta}_{\text{move to I}} - \underbrace{\alpha_{ni} N_i \mu}_{\text{loss dispersal}} - \underbrace{\alpha_{ni} N_i [1 - I^\delta] [1 - \mu]}_{\text{move to H}} + \underbrace{\beta_i \rho_{vh} N_h}_{\text{host infect}} - \underbrace{\beta_v N_i}_{\text{vector infect}} + \underbrace{\gamma V_h + \gamma V_i}_{\text{vectors recovered}}$                                                      |                                                                                                                                           |
| $\frac{dV_i}{dt} = r_i [N_i + V_i] \left[ 1 - \frac{N_i + V_i}{K_i IF} \right] - \underbrace{\alpha_{vi} V_i [1 - \mu] H^\epsilon}_{\text{move to H}} - \underbrace{\alpha_{vi} V_i \mu}_{\text{loss dispersal}} + \underbrace{\alpha_{vh} V_h [1 - \mu] [1 - H^\epsilon]}_{\text{move to I}} + \underbrace{\beta_i \rho_{vh} V_h}_{\text{host infect}} + \underbrace{\beta_v N_i}_{\text{vector infect}} - \underbrace{\gamma V_i}_{\text{vectors recovered}}$ |                                                                                                                                           |
| $\frac{dV_h}{dt} = \underbrace{\alpha_{vi} V_i [1 - \mu] H^\epsilon}_{\text{move to H}} - \underbrace{\alpha_{vh} V_h \mu}_{\text{dispersal loss}} - \underbrace{\alpha_{vh} V_h [1 - \mu] [1 - H^\epsilon]}_{\text{move to I}} - \underbrace{\beta_i \rho_{vh} V_h}_{\text{host infect}} - \underbrace{\gamma V_h}_{\text{vectors recovered}}$                                                                                                                 |                                                                                                                                           |
| Host equations                                                                                                                                                                                                                                                                                                                                                                                                                                                  | Vector per host density functions                                                                                                         |
| $\frac{dH}{dt} = - \underbrace{\beta_i \rho_{vh}}_{\text{infect host}}$ $\frac{dI}{dt} = \underbrace{\beta_i \rho_{vh}}_{\text{infect host}}$                                                                                                                                                                                                                                                                                                                   | $\rho_h = \frac{V_h + N_h}{HF + \xi}, \quad \rho_i = \frac{V_i + N_i}{IF + \xi}, \quad \text{and} \quad \rho_{vh} = \frac{V_h}{HF + \xi}$ |

320

321

322 We ran simulations with parameter values as described in Table 1 using Matlab 2018 to  
 323 explore the impact of virus effects on the time required for 80% of susceptible hosts to  
 324 become infected (Model 1, discussed in main manuscript). We focused on the behavior  
 325 (orientation preference [ $\epsilon$ ] and departure rate [ $ah$ ]) and performance (growth rate [ $r_i$ ]) of non-  
 326 viruliferous vectors in relation to virus-infected and non-infected hosts and assumed that  
 327 viruliferous vector settling preference ( $\epsilon$ ) did not change following virus acquisition. We  
 328 modeled this by setting the viruliferous vector settling preference above one ( $\epsilon > 1$ ) to  
 329 simulate maintenance of orientation preference for infected hosts (if present based on  
 330 CPNPr or NCNP parameter values) even after virus acquisition. The original model also  
 331 explored the impact of changes in vector preference following acquisition of a virus, so-called  
 332 *conditional vector preferences* (Roosien et al. 2013; Shaw et al. 2017). Our meta-analysis  
 333 does not include publications that explore conditional vector preferences due to a lack of  
 334 studies. However, to consider the possible influence of conditional preferences in the context  
 335 of the parameter values derived from our database, we ran additional simulations by  
 336 modifying the degree of viruliferous vector preference for settling on infected vs. healthy  
 337 hosts. We modified  $\epsilon$  to simulate loss of orientation preference after acquisition (chooses  
 338 equally among infected and healthy hosts,  $\epsilon = 1$ ) (Model 2) and reversal of orientation  
 339 preference after acquisition ( $\epsilon = \delta$ ) (Model 3). These additional simulations are included in  
 340 electronic supplementary file ESM\_model outputs.xlsx.

341

342 We were also interested in exploring the relative influence of virus effects on vector  
343 responses ( $r_i$ ,  $a_i$ , and  $\delta$ ) relative to intrinsic virus traits (combinations of  $\beta_v$ ,  $\beta_i$ , and  $\gamma$  values  
344 corresponding to CPNPr and NCNP viruses). We combined trait values ( $\beta_v$ ,  $\beta_i$ , and  $\gamma$ ) for  
345 CPNPr viruses with vector response values ( $r_i$ ,  $a_i$ , and  $\delta$ ) for NCNP viruses, and vice versa,  
346 then performed simulations as described above for initial and post-acquisition (conditional)  
347 vector preferences. Simulations for the main model are presented in the results and  
348 simulations for Model 2 and Model 3 in electronic supplementary file ESM\_model  
349 outputs.xlsx.

350

351

## 352 **Results**

353

### 354 ***Plant virus infection effects on vector orientation preference, settling/feeding*** 355 ***behavior, and performance***

356 Plant virus infection had significant positive effects on vector orientation preference (figure  
357 1a; ESM\_meta-analysis.docx, table S2a), vector settling/feeding behaviors (figure 1b;  
358 ESM\_meta-analysis.docx, table S2b) and vector performance (figure 1c; ESM\_meta-  
359 analysis.docx, table S2c). These results were robust to publication bias (fail-safe N,  
360 ESM\_meta-analysis.docx, Notes S4).

361

### 362 ***Analysis based on virus traits: Infection location in plant hosts***

363 The effects of plant virus infection on vector orientation preference vary depending on the  
364 location from which the virus must be acquired from and/or transmitted into the host plant  
365 ( $Q_M = 31.29$ ,  $p < .0001$ ; ESM\_meta-analysis.docx, table S1). Plants infected by phloem-  
366 limited (PL) viruses become more attractive to vectors than non-infected plants, whereas  
367 plants infected with non-phloem-limited (NPL) viruses do not become more attractive to  
368 vectors than non-infected plants (figure 1a; ESM\_meta-analysis.docx, table S2a). The effects  
369 of plant virus infection on vector settling and feeding behaviors also depend on the virus  
370 infection location in the host ( $Q_M = 26.51$ ,  $p < .0001$ ; ESM\_meta-analysis.docx, table S1).  
371 Plant infection by PL viruses leads to greater rates of vector settling and feeding behaviors  
372 associated with host acceptance, whereas NPL virus infections do not alter settling/feeding  
373 behaviors (figure 1b; ESM\_meta-analysis.docx, table S2b). The stronger effect of PL viruses  
374 on vector settling/feeding behaviors is consistent with results for vector performance ( $Q_M =$   
375  $36.22$ ,  $p < .0001$ ; ESM\_meta-analysis.docx, table S1). Plants infected by a PL virus support  
376 increased vector performance compared to non-infected plants, whereas plants infected with  
377 NPL viruses do not support significantly enhanced vector performance relative to non-  
378 infected plants (figure 1c; ESM\_meta-analysis.docx, table S2c).

379

380 ***Analysis based on virus traits: Retention mechanism in the vector***

381 The effects of plant virus infection on vector orientation preference vary depending on how  
382 the virus is retained within the vector ( $Q_M = 93.92$ ,  $p < .0001$ ; ESM\_meta-analysis.docx, table  
383 S1). Plants infected by circulative-persistent non-propagative (CPNPr) viruses were more  
384 attractive to vectors than non-infected plants, but enhanced vector attraction was not seen  
385 for any other type of virus (figure 2a; ESM\_meta-analysis.docx, table S2a). CPNPr virus  
386 infection also enhanced host attractiveness to vectors relative to non-infected hosts to a  
387 greater extent than both non-circulative semi-persistent (NCSP) viruses and non-circulative  
388 non-persistent (NCNP) viruses (figure 2a). The effects of plant virus infection on vector  
389 settling and feeding behavior also vary depending on virus retention mechanism ( $Q_M = 37.60$ ,  
390  $p < .0001$ ; ESM\_meta-analysis.docx, table S1). Plants infected by circulative-persistent  
391 propagative (CPPr) viruses, CPNPr viruses, or NCSP viruses experience phenotypic shifts  
392 that encourage greater vector settling/feeding behaviors relative to non-infected plants, but  
393 plants infected by NCNP viruses experience similar rates of vector settling and ease of  
394 feeding relative to non-infected hosts (figure 2a; ESM\_meta-analysis.docx, table S2b).  
395 Additionally, vector settling/feeding propensity for infected relative to non-infected hosts is  
396 significantly greater for CPNPr and NCSP viruses compared to NCNP viruses (figure 2b). For  
397 vector performance, again virus retention mechanism is a significant predictor of variation  
398 ( $Q_M = 41.98$ ,  $p < .0001$ ; ESM\_meta-analysis.docx, table S1). However, in this case, only  
399 infection by CPNPr viruses increases vector performance on infected hosts over non-infected  
400 hosts; infections by viruses with the other three retention mechanisms do not increase vector  
401 performance on infected hosts relative to non-infected hosts (figure 2c; ESM\_meta-  
402 analysis.docx, table S2c).

403

404 ***Analysis by phylogeny: Virus classification***

405 The effects of plant infection on vector orientation preference vary depending on virus family  
406 ( $Q_M = 112.24$ ,  $p < .0001$ ; ESM\_meta-analysis.docx, table S1). Only four virus families had  
407 sufficient representation within the literature to be included in the analysis for orientation  
408 preference (Figure 2a). Of these families, infections by Bromoviridae and Luteoviridae induce  
409 host phenotypes that are more attractive than those of non-infected plants, but plants  
410 infected by Potyviridae and Reoviridae are not differentially attractive (figure 2a; ESM\_meta-  
411 analysis.docx, table S2a). Within studies focusing on vector settling and feeding behavior,  
412 eight virus families had sufficient representation for inclusion in the analysis (Figure 2b). The  
413 effects of plant infection on vector settling and feeding behaviors vary depending on virus  
414 family ( $Q_M = 73.54$ ,  $p < .0001$ ; ESM\_meta-analysis.docx, table S1). Infections by Luteoviridae  
415 and Tospoviridae increase vector settling and/or ease of feeding on hosts relative to non-

416 infected plants, but infections by Bromoviridae, Closteroviridae, Geminiviridae, Potyviridae,  
417 Reoviridae and Secoviridae do not significantly influence vector settling or ease of feeding  
418 (figure 2b; ESM\_meta-analysis.docx, table S2b). For the vector performance metric, seven  
419 virus families were sufficiently well represented for inclusion in the analysis (Figure 2c). As  
420 for orientation preference and settling/feeding behaviors, the effects of plant infection status  
421 on vector performance varied depending on the virus family ( $Q_M = 70.39$ ,  $p < .0001$ ;  
422 ESM\_meta-analysis.docx, table S1). Infections by Geminiviridae and Luteoviridae increased  
423 vector performance on infected hosts relative to non-infected plants, but infections by  
424 representatives of other virus families did not affect vector performance (figure 2c;  
425 ESM\_meta-analysis.docx, table S2c).  
426

**a) Orientation preference**

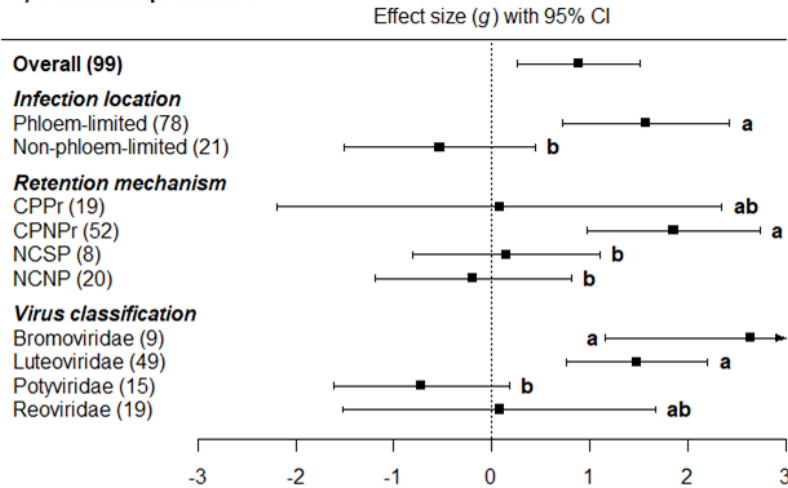

**b) Settling/feeding behaviors**

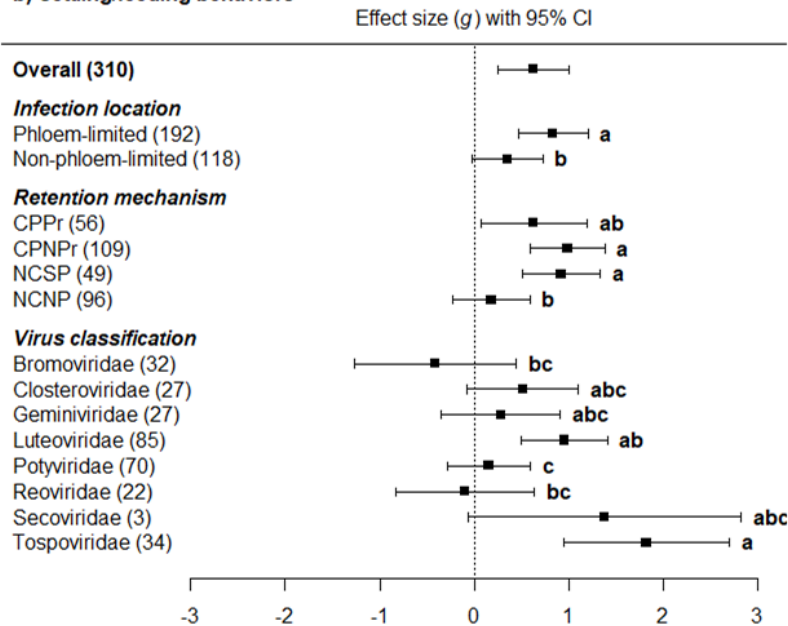

**c) Performance**

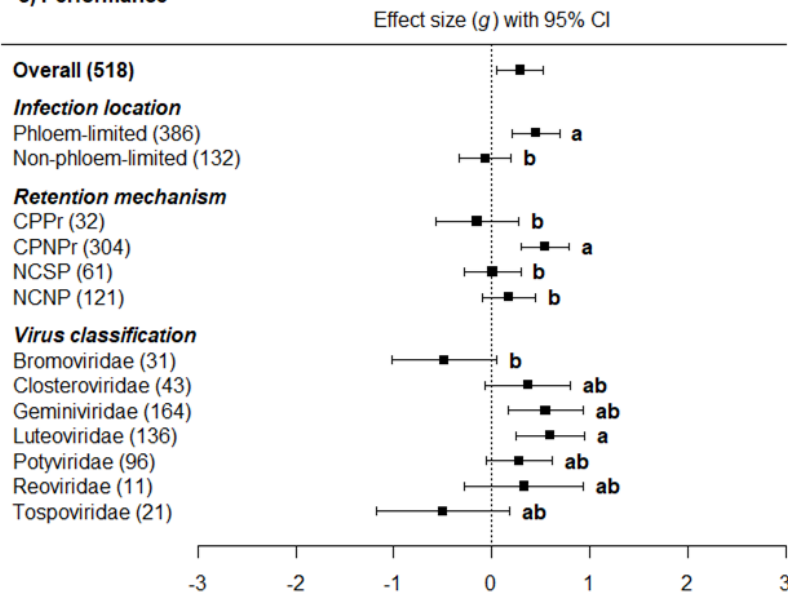



428 **Figure 2.** Effect size (Hedges'  $g$ ) estimates and 95% CIs showing the effects of plant infection on  
 429 vector a) attraction, b) settling/feeding behaviors and c) performance. Negative values of  $d$  indicate a  
 430 negative effect of plant infection on vector behaviors or performance. Arrows drawn at the ends of  
 431 error bars indicate 95% CIs for Hedges'  $g$  that are outside the scale of the plotting region. Numbers in  
 432 brackets indicate the number of studies used to inform each estimate (see ESM\_meta-analysis.docx,  
 433 table S2a, b and c, for complete sample size information).

434

### 435 **Modeling implications for virus spread**

436 Figure 3 covers simulations where phloem-limited, circulative-persistent, non-propagative  
 437 (PL-CPNPr) virus traits ( $\beta_v$  and  $\gamma$ ) are combined with PL-CPNPr virus parameter values and  
 438 ranges for ( $r$ ,  $a$ ,  $\delta$  and  $\epsilon$ ), and non-phloem-limited, non-circulative, non-persistent (NPL-  
 439 NCNP) virus traits are combined with NPL-NCNP virus parameter values and ranges for ( $r$ ,  
 440  $a$ ,  $\delta$  and  $\epsilon$ ). Simulation outputs suggest that changes in host phenotype that enhance vector  
 441 performance, orientation preference, and settling/feeding have little effect on PL-CPNPr virus  
 442 spread (as time to 80% host infection), but relatively large effects on NPL-NCNP virus spread  
 443 (Fig. 3, Table 3).

444

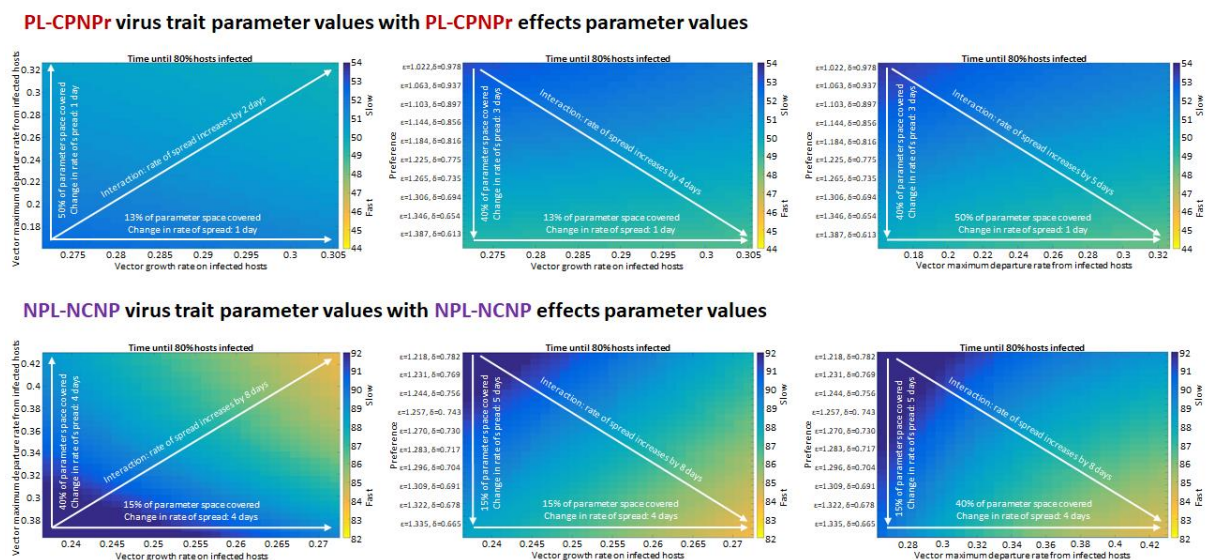

445

446 **Figure 3:** Main model simulation outputs for the two virus trait categories (PL-CPNPr and NPL-NCNP)  
 447 with their corresponding virus effects values ( $r$ ,  $a$ ,  $\delta$  and  $\epsilon$ ). For this model, virus effects on vector  
 448 preferences do not change following virion acquisition. Overlays on simulation heatmaps describe the  
 449 percentage of total available parameter space covered along each axis and the estimated maximum  
 450 change in time to 80% host infection from one end of the axis to the other. Decreases in time to 80% host infection  
 451 are indicated by arrow directionality. Simulation outputs are also represented quantitatively in Table 3.

452

| a) PL-CPNPr virus                          |       | Preference | Performance | Departure |
|--------------------------------------------|-------|------------|-------------|-----------|
| Parameter space                            | Range | 0.61-0.98  | 0.27-0.31   | 0.16-0.32 |
|                                            | %     | 40%        | 13%         | 50%       |
| Variation in "time to 80% infected"        | Days  | 3 days     | 1 day       | 1 day     |
|                                            | %     | -5.50%     | -1.85%      | -1.85%    |
| Normalized variation (10% parameter space) |       | -1.38%     | -1.42%      | -0.37%    |

  

| b) NPL-NCNP virus                          |       | Preference | Performance | Departure |
|--------------------------------------------|-------|------------|-------------|-----------|
| Parameter space                            | Range | 0.66-0.78  | 0.235-0.275 | 0.26-0.43 |
|                                            | %     | 15%        | 15%         | 40%       |
| Variation in "time to 80% infected"        | Days  | 5 days     | 4 days      | 4 days    |
|                                            | %     | -5.43%     | -4.35%      | -4.35%    |
| Normalized variation (10% parameter space) |       | -3.62%     | -2.90%      | -1.09%    |

453

454 **Table 3.** Simulation outputs for a) Phloem-limited, circulative-persistent, non-propagative (PL-CPNPr)  
 455 virus traits ( $\beta_v$  and  $\gamma$ ) combined with PL-CPNPr virus parameter values and ranges ( $r$ ,  $a$ ,  $\delta$  and  $\epsilon$ ) and  
 456 b) Non-phloem-limited, non-circulative, non-persistent (NPL-NCNP) virus traits combined with NPL-  
 457 NCNP virus parameter values and ranges for ( $r$ ,  $a$ ,  $\delta$  and  $\epsilon$ ).

458

459 In simulations, vector maximum departure rate parameter values for PL-CPNPr viruses  
 460 covered 50% of the available parameter space (0.16-0.32), but the maximum departure rate  
 461 within this window only resulted in a 1.85% reduction (approx. 1 day) in time to 80% infection  
 462 (Fig. 3, Table 3). In contrast, for NPL-NCNP viruses, values for maximum departure rate  
 463 covered 40% of parameter space (0.26-0.43), with the maximum departure rate within this  
 464 window producing a 4.35% reduction (approx. 4 days) in time to 80% infection (Fig. 3, Table  
 465 3). Parameter values for vector growth rate on infected plants covered 13% of the parameter  
 466 space for PL-CPNPr viruses (Table 3), and 15% of the parameter space for NPL-NCNP  
 467 viruses (Table 3). Even though the proportion of space covered is similar, the maximum gain  
 468 in rate of spread for PL-CPNPr viruses is one day, but NPL-NCNP virus spread occurs four  
 469 days faster at the largest vector growth rate values (Fig. 3, Table 3). For both PL-CPNPr  
 470 viruses and NPL-NCNP viruses, vector preference had the greatest effect on time to 80%  
 471 infection. For a range of values covering 40% of parameter space, PL-CPNPr virus spread  
 472 occurred three days faster at values corresponding to the maximum preference for infected  
 473 hosts. However, for NPL-NCNP viruses, a range of values covering just 15% of parameter  
 474 space reduced time to 80% infection by up to 5.43% (approx. 5 days) at values  
 475 corresponding to maximum preference for infected hosts. If these results are normalized to  
 476 the percent change for 10% of parameter space, it is apparent that across all virus effects  
 477 categories, the same change in parameter values produces between two and three times the  
 478 effect for NPL-NCNP viruses relative to PL-CPNPr viruses (Table 3).

479  
480  
481  
482  
483  
484  
485  
486  
487  
488  
489  
490  
491

To explore the relative influence of virus traits vs. virus effects on host phenotypes, we ran each simulation a second time using PL-CPNPr virus trait values ( $\beta$  and  $\gamma$ ) with NPL-NCNP virus values for virus effects ( $r$ ,  $a$ ,  $\delta$ , and  $\varepsilon$ ), and vice versa. Substituting NPL-NCNP virus effects values ( $r$ ,  $a$ ,  $\delta$ , and  $\varepsilon$ ) in a model maintaining PL-CPNPr virus trait values ( $\beta$  and  $\gamma$ ) had little effect on PL-CPNPr virus spread (Fig. 4). However, for NPL-NCNP trait values ( $\beta$  and  $\gamma$ ) paired with PL-CPNPr virus values for virus effects ( $r$ ,  $a$ ,  $\delta$ , and  $\varepsilon$ ) this was not the case. First, substituting PL-CPNPr virus values for vector growth rate on infected plants and vector orientation preference resulted in slower overall rates of virus spread relative to use of NPL-NCNP virus parameters ( $r$ ,  $a$ ,  $\delta$ , and  $\varepsilon$ ) (Fig. 4). There were also slightly positive effects on virus spread due to substitution of PL-CPNPr virus values for vector maximum departure rate ( $a$ ) (Fig. 4).

**PL-CPNPr virus trait parameter values with NPL-NCNP effects parameter values**

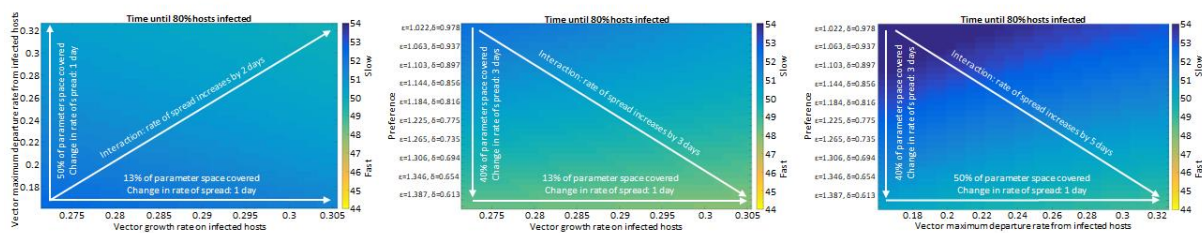

**NPL-NCNP virus trait parameter values with PL-CPNPr effects parameter values**

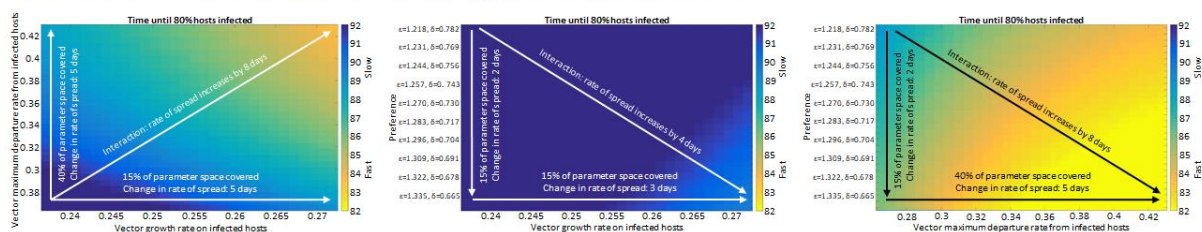

492  
493  
494  
495  
496  
497  
498  
499  
500

**Figure 4:** Main model simulation outputs for the two virus trait categories (PL-CPNPr and NPL-NCNP) with virus effects values ( $r$ ,  $a$ ,  $\delta$  and  $\varepsilon$ ) corresponding to the opposite virus trait category. For this model, virus effects on vector preferences do not change following virion acquisition. Overlays on simulation heatmaps describe the percentage of total available parameter space covered along each axis and the estimated maximum change in virus spread from one end of the axis to the other. Decreases in time to 80% host infection are indicated by arrow directionality. Simulation outputs are also represented quantitatively in Table 4.

| a) PL-CPNPr virus traits<br>NPL-NCNP virus effects |            | Preference       | Performance      | Departure        |
|----------------------------------------------------|------------|------------------|------------------|------------------|
| Parameter space                                    | Range<br>% | 0.61-0.98<br>40% | 0.27-0.31<br>13% | 0.16-0.32<br>50% |
| Variation in<br>"time to 80% infected"             | Days<br>%  | 3 days<br>-5.50% | 1 day<br>-1.85%  | 1 day<br>-1.85%  |
| Normalized variation<br>(10% parameter space)      |            | -1.38%           | -1.42%           | -0.37%           |

  

| b) NPL-NCNP virus traits<br>PL-CPNPr virus effects |            | Preference       | Performance        | Departure        |
|----------------------------------------------------|------------|------------------|--------------------|------------------|
| Parameter space                                    | Range<br>% | 0.66-0.78<br>15% | 0.235-0.275<br>15% | 0.26-0.43<br>40% |
| Variation in<br>"time to 80% infected"             | Days<br>%  | 2 days<br>-2.17% | 5 days<br>-5.43%   | 5 days<br>-5.43% |
| Normalized variation<br>(10% parameter space)      |            | -1.45%           | -3.62%             | -1.36%           |

501

502

503 **Table 4.** Simulation outputs for a) Phloem-limited, circulative-persistent, non-propagative (PL-CPNPr)  
 504 virus traits ( $\beta_v$  and  $\gamma$ ) combined with NPL-NCNP virus parameter values and ranges ( $r$ ,  $a$ ,  $\delta$  and  $\varepsilon$ ) and  
 505 b) Non-phloem-limited, non-circulative, non-persistent (NPL-NCNP) virus traits combined with PL-  
 506 CPNPr virus parameter values and ranges for ( $r$ ,  $a$ ,  $\delta$  and  $\varepsilon$ ).

507

508 Beyond virus effects parameters, the model simulations reveal the influence of virus traits on  
 509 the overall rate of virus spread in a host population. In simulations using PL-CPNPr virus  
 510 traits, with vectors maintaining viruliferous status ( $\gamma = 0$ ) and having a dispersal loss  
 511 (mortality,  $\mu$ ) value of 53.67% +/- 21.39, the minimum time to 80% of hosts becoming  
 512 infected is 44 days and the maximum is 54 days. In contrast, for the NPL-NCNP virus trait  
 513 values (same dispersal loss value, but  $\gamma = 1$  to approximate daily loss of acquired virus) the  
 514 minimum time to 80% infection is 82 days, with a maximum of 92 days. Thus, according to  
 515 our simulations, the viruses with NPL-NCNP traits take twice as long to infect 80% of the  
 516 host population relative to viruses with PL-CPNPr traits in a context that includes an aphid  
 517 vector capable of colonizing the host.

518

519 Inclusion of conditional vector preferences had little effect on the rate of PL-CPNPr virus  
 520 spread regardless of whether virus effects parameter values were those of PL-CPNPr  
 521 viruses or NPL-NCNP viruses. NPL-NCNP virus spread was slightly faster when conditional  
 522 vector preferences were included, either as a loss of preference following virus acquisition  
 523 (Model 2) or as a switch in preference (Model 3). This effect was only evident when NPL-  
 524 NCNP virus trait parameter values were paired with NPL-NCNP virus effect parameter  
 525 values. Simulations and tabular summaries for Model 2 and Model 3 are available in the  
 526 electronic supplementary material, file ESM\_model outputs.xlsx.



## 527 **Discussion**

### 528 ***Quantitative synthesis and support for predictions***

529 We predicted that enhanced attractiveness to vectors should be a host phenotypic change  
530 common to all virus trait groups, but enhanced palatability and plant quality should be  
531 significantly more apparent for trait groups that require long-term feeding for virus acquisition  
532 (PL viruses), which includes most representatives of viruses retained in vectors for long  
533 periods (CPPr, CPNPr, and NCSP) (Fig. 1). Our synthesis provides support for these  
534 predictions, as we saw significant differences based on virus traits for multiple response  
535 variables. For example, when considering site of acquisition/inoculation as a factor, PL virus  
536 effects conformed to all predictions, eliciting enhancements in vector orientation preferences,  
537 settling/feeding preferences, and performance on infected hosts (Fig. 2). NPL viruses also  
538 conformed to predictions for settling/feeding and performance response variables; effects on  
539 vector preference and performance did not deviate from zero, and were significantly different  
540 from preference/performance values for PL viruses in the expected direction (Fig. 2).  
541 However, NPL virus effects were not consistent with our prediction that all virus trait groups  
542 should enhance plant attractiveness to vectors (Fig. 1, Fig. 2a). On average, NPL viruses  
543 have neutral, but not detrimental, effects on vector attraction (Fig. 2a). While this may not be  
544 an obvious case of vector manipulation by plant viruses, a neutral result is still consistent  
545 with an adaptive explanation for virus effects because we expect selection to disfavor virus  
546 genotypes that *reduce* opportunities for transmission, but favor virus genotypes with *neutral*  
547 *to positive* effects on transmission (Anderson *et al.* 1992; Poulin 2010). This hypothesis is  
548 also supported by the meta-analysis output: we did not detect a single instance of an effect  
549 size confidence interval deviating from zero in a *negative* direction, suggesting that there is  
550 selection against virus genotypes that elicit phenotypes with strongly negative effects on  
551 vector-host interactions.

552

553 The vector settling/feeding response variable is arguably the most important in our study  
554 given that it is the stage in the vector-host interaction where the viruliferous status (i.e., virus  
555 acquisition) of the vector is determined (Ferreles & Moreno 2009). Thus, even if contact with  
556 infected hosts is not influenced by infection status (Fig. 2a) and there are no strong effects of  
557 infection on vector performance (Fig. 2c), selection should favor virus adaptations that  
558 ensure vectors engage in probing and feeding behaviors required for efficient virus  
559 acquisition and retention. We detected indirect evidence of adaptations producing positive  
560 effects on vector settling/feeding for all of the virus trait categories expected to benefit from  
561 them, even when we analyzed the dataset with virus retention mechanism as the factor.  
562 Viruses with CPPr, CPNPr, and NCSP retention mechanisms (nearly all of which are PL)  
563 significantly enhanced vector settling and feeding preferences for infected hosts (Fig. 2b).

564 We also detected neutral effects for the virus categories expected to experience reductions  
565 in transmission when infection enhances palatability, settling, and sustained feeding prior to  
566 dispersal (NPL viruses with the NCNP transmission mechanism) (Fig. 2b). Thus, for the  
567 settling/feeding response variable, which we argue is the most critical of the three for virus  
568 fitness, the prediction of convergence based on shared virus traits is strongly supported.

569

570 We hypothesized that virus effects on vector settling/feeding behavior would be congruent  
571 with effects on vector performance, but this was not the case (Fig. 2b, c). Instead, viruses  
572 have mostly neutral effects. Although PL viruses enhanced performance overall, this appears  
573 to be driven by the effects of CPNPr viruses (which had more observations than any other  
574 group) (Fig. 2c). CPPr and NCSP viruses, as well as respective virus families containing taxa  
575 with these retention mechanisms, do not strongly influence vector performance. This may  
576 reflect limitations imposed by other traits inherent to viruses within each retention mechanism  
577 category. For example, CPPr viruses also use the vector as a host for replication, so a  
578 neutral effect may still be interpreted as evidence of adaptation, as it could indicate that the  
579 actively replicating virus does not have strongly pathological effects on the vector, or that  
580 phenotypic changes in the host help to counteract slight pathological effects (Belliere *et al.*  
581 2005). Direct effects of viruses are changes in vector behavior or performance that occur as  
582 a result of acquiring and retaining virions, and are apparent in some CPPr and CPNPr  
583 pathosystems (Stafford *et al.* 2011; Ingwell *et al.* 2012; Moreno-Delafuente *et al.* 2013;  
584 Roosien *et al.* 2013; Rajabaskar *et al.* 2014; Mauck *et al.* 2018a, 2019). However, there are  
585 not sufficient data to explore the interplay of direct and indirect virus effects on vectors  
586 through meta-analysis approaches. Overall, the meta-analysis highlights the need for  
587 additional studies across more diverse pathosystems while providing the first quantitative  
588 evidence supporting an adaptive explanation for putative instances of vector manipulation by  
589 plant viruses.

590

### 591 ***Comparing the quantitative synthesis to a model***

592 We leveraged data assembled for the meta-analysis to assess how virus-induced  
593 manipulation of hosts and vectors may affect the rate of transmission in theoretical  
594 simulations by modifying a published model (Shaw *et al.* 2017) that explores the spread of  
595 viruses with divergent traits (aphid-transmitted PL-CPNPr viruses and NPL-NCNP viruses).  
596 Simulation outputs indicate that the range of parameter values derived from the meta-  
597 analysis database were sufficient to produce positive effects on virus spread for both trait  
598 groups (Fig. 3). However, the magnitude of these effects differed depending on the trait  
599 group being examined. Across all virus effects categories, the same change in virus effects  
600 parameter values produced between two and three times the effect for NPL-NCNP viruses

601 relative to PL-CPNPr viruses (Table 3). This difference suggests that PL-CPNPr viruses (and  
602 perhaps PL viruses generally) may be under more intense selection pressure to elicit  
603 stronger effects on host phenotypes and vector behavior in order to experience fitness  
604 benefits of manipulation. In contrast, our results suggest that NPL-NCNP viruses may  
605 experience less intense selection pressure to manipulate hosts and vectors because even  
606 small effects can produce significant changes in the rate of spread. These results are  
607 strongly congruent with meta-analysis outputs: PL virus effects were significantly different  
608 from zero in the positive direction and significantly different from NPL virus effects (which  
609 were uniformly neutral) across all three response variables.

610

611 Simulations with virus trait parameters swapped with virus effects parameters (Fig. 4, Table  
612 4) reveal that NPL-NCNP viruses may incur costs for eliciting effects that are predicted to be  
613 adaptive for PL-CPNPr viruses. Combining NPL-NCNP virus trait parameters with PL-CPNPr  
614 effects parameters (Fig. 4) slowed virus spread relative to the original virus trait-virus effects  
615 combinations (Fig. 3). Simulations reveal that this is partially due to the influence of  
616 parameter values that we predicted to be beneficial for PL-CPNPr virus spread (higher vector  
617 growth rate on infected hosts), which is consistent with our initial predictions (Fig. 1).  
618 However, NPL-NCNP virus spread was also slowed by enhancing vector orientation  
619 preference for infected hosts (Fig. 4), which is at odds with our initial prediction that  
620 enhancing vector attraction to infected hosts would be generally beneficial for all virus trait  
621 groups (Fig. 1). Thus, the model simulations indicate that neutral effects of NPL viruses on  
622 vector attraction to infected hosts (Fig. 2a) may actually lead to faster NPL virus spread (Fig.  
623 3) relative to a situation where vectors are strongly attracted to NPL-infected hosts (Fig. 4).  
624 Theoretical work on plant virus manipulation of hosts and vectors (McElhany *et al.* 1995;  
625 Sisterson 2008) and parasite manipulation literature generally (Lefèvre *et al.* 2006; Poulin  
626 2010; Lafferty & Shaw 2013; Heil 2016) both support the idea that vector attraction to  
627 infected hosts is generally beneficial for parasite fitness. But interpretation of our meta-  
628 analysis and model simulations together indicates that relative benefits of vector preferences  
629 for infected hosts strongly depend on additional transmission mechanism traits that  
630 determine which vector behaviors are required for virus acquisition and transmission.

631

### 632 ***Limitations, ecological dimensions, and future directions***

633 The meta-analysis and model both focus on pathosystems consisting of one host species,  
634 one virus isolate, and a single colonizing vector species. This simplification is necessary to  
635 make empirical and theoretical exercises logistically practical and congruent. However,  
636 elimination of additional ecological dimensions will influence interpretations, including those  
637 of the present study. A key example is the difference in time to 80% host infection between



638 virus trait groups in our model simulations. PL-CPNPr viruses infected 80% of the host  
639 population in roughly half the time it took for NPL-NCNP viruses to reach the same infection  
640 level (44-54 days vs. 82-92 days) (Figs. 3 and 4). From this result, we might conclude that  
641 acquisition from the phloem and indefinite retention in the vector confer large advantages  
642 over an NPL-NCNP lifestyle; certainly much larger than virus effects on host phenotype and  
643 vector behavior, which, at maximum, increases the rate of virus spread by 9-10 days.  
644 However, NPL-NCNP viruses are both common and widely successful; at least 40% of  
645 characterized viruses are NPL-NCNP viruses (Hogenhout *et al.* 2008) and globally, NPL  
646 viruses are major threats to agricultural production. From this we can conclude that our  
647 model (Shaw *et al.* 2017) and others with similar features (McElhany *et al.* 1995; Sisterson  
648 2008; Roosien *et al.* 2013; Shaw *et al.* 2019) do not fully represent the range and variety of  
649 transmission opportunities available for NPL-NCNP viruses.

650

651 We explored this possibility by quantifying the number of vector species capable of  
652 transmitting each virus included in the meta-analysis. PL viruses have intimate, co-evolved  
653 interactions with vectors that are capable of feeding from the phloem of the virus's host  
654 plants (Hogenhout *et al.* 2008). Consistent with this, we found that >80% of the PL viruses in  
655 our meta-analysis database are transmitted by three or fewer vector species (Fig. S1,  
656 electronic supplementary material, file ESM\_vector database.docx). Thus, we hypothesized  
657 that PL viruses generate transmission opportunities by interacting with a select few species  
658 that colonize hosts long enough to acquire virions. This is the exact scenario represented by  
659 most of the empirical studies in our meta-analysis database and our mathematical models,  
660 which simulated the transmission of a virus by a single vector capable of feeding and  
661 surviving on the host for at least 24 hours (Shaw *et al.* 2017). However, this scenario is the  
662 opposite of the ecological reality for NPL-NCNP viruses, which are acquired by rapid probing,  
663 but not phloem-feeding, and are therefore transmissible by vectors for which the infected  
664 host species is not suitable (Ng & Falk 2006; Fereres 2016). In our models, reliance on a  
665 single colonizing vector significantly slowed NPL-NCNP virus spread and seemed to suggest  
666 that the NPL-NCNP lifestyle is a major drawback. In reality, nearly 70% of the NPL viruses  
667 included in the meta-analysis are transmissible by more than 20 vector species, and all are  
668 transmissible by 5 or more vector species (Fig. S1, electronic supplementary material, file  
669 ESM\_vector database.docx). Thus, while PL viruses rely on a select few colonizing species,  
670 most NPL viruses seem to generate transmission opportunities by interacting with a large  
671 number of species that need not colonize the host, or feed on the phloem, to acquire virions  
672 (Bosque-Pérez & Eigenbrode 2011).

673

674 This ecological reality is rarely considered in empirical studies and has not been included in  
675 any models exploring vector manipulation to date (McElhany *et al.* 1995; Madden *et al.* 2000;  
676 Sisterson 2008; Roosien *et al.* 2013; Shaw *et al.* 2017, 2019; Mauck *et al.* 2018). But we can  
677 speculate that the difference in transmission opportunities between PL and NPL viruses will  
678 significantly influence the relative fitness benefits of host manipulation for these virus trait  
679 groups. Plant viruses have limited coding capacity and fixation of a mutation is strongly  
680 dependent on a lack of epistatic interactions with other sites in the genome and a lack of  
681 pleiotropic effects (e.g., reduced replication rate in the host or a modified host range)  
682 (Bedhomme *et al.* 2012; Betancourt *et al.* 2013; García-Arenal & Fraile 2013; Elena 2016).  
683 For NPL viruses, pleiotropic effects may manifest as reduced opportunities for transmission;  
684 mutations that facilitate manipulation of one vector species might compromise transmission  
685 by several other vector species. However, neutral effects on host phenotypes (as observed  
686 in our meta-analysis) would increase the likelihood that most competent vector species will  
687 visit some infected plants and engage in behaviors required for efficient NPL virus  
688 transmission (rapid probing and dispersal) due to host plant incompatibility, and regardless of  
689 infection status (Rydén *et al.* 1983; Sigvald 1989; Angelella *et al.* 2015; Mondal *et al.* 2016).  
690 In contrast, PL viruses that rely on a select few vector species for transmission may  
691 experience substantial gains by increasing the probability of transmission-conducive contacts  
692 with these species (Fig. S1, electronic supplementary material, file ESM\_vector  
693 database.docx).

694

695 Transmission opportunities is just one ecological dimension influencing virus evolution, and  
696 there are certainly more factors that could shape selection for or against manipulative traits,  
697 including, but not limited to, host diversity, abiotic conditions, vector natural enemies, and  
698 effects of host phenotype manipulations on resistance against non-vector pests and other  
699 pathogens (Jeger *et al.* 2011; Kersch-Becker & Thaler 2013; Mauck *et al.* 2014b, 2015;  
700 Davis *et al.* 2015; Chesnais *et al.* 2019). The present synthesis provides an important  
701 milestone by quantifying the magnitude and adaptive significance of virus effects on vectors  
702 while also emphasizing the need for additional research in different contexts and  
703 pathosystems. For example, PL-CPNPr viruses in the *Luteoviridae* are overrepresented in  
704 the meta-analysis (Fig. 2), while some other virus groups consist of only a few observations.  
705 Lack of data on certain virus groups may reflect their relative economic importance,  
706 quarantine status, or tractability for laboratory studies. Incorporating new pathosystems and  
707 ecological dimensions into future empirical and theoretical work is therefore necessary to  
708 understand the frequency and relevance of virus manipulation in real-world scenarios. The  
709 number of researchers studying this topic is growing (Mauck *et al.* 2018, 2019), as is interest  
710 in finding ways to manage manipulative effects of viruses in agricultural contexts (Bak *et al.*

711 2019) and understanding their importance in wild systems (Alexander *et al.* 2014). Tackling  
712 these ambitious research directions requires integrative approaches informed by virology,  
713 ecology, entomology, and plant biology. We hope our study will stimulate the research  
714 community to develop and test hypotheses that provide a more complete understanding of  
715 host and vector manipulation by plant viruses in ecological contexts that include  
716 consideration of virus traits.

717

## 718 **References**

- 719 Alexander, H.M., Mauck, K.E., Whitfield, A.E., Garrett, K.A. & Malmstrom, C.M. (2014).  
720 Plant-virus interactions and the agro-ecological interface. *Eur. J. Plant Pathol.*, 138,  
721 529–547.
- 722 Anderson, R.M., Anderson, B. & May, R.M. (1992). *Infectious Diseases of Humans:  
723 Dynamics and Control*. OUP Oxford.
- 724 Angelella, G.M., Egel, D.S., Holland, J.D., Nemacheck, J.A., Williams, C.E. & Kaplan, I.  
725 (2015). Differential life history trait associations of aphids with non-persistent viruses in  
726 cucurbits. *Environ. Entomol.*, 44, 562–573.
- 727 Bak, A., Patton, M.F., Perilla-Henao, L.M., Aegerter, B.J. & Casteel, C.L. (2019). Ethylene  
728 signaling mediates potyvirus spread by aphid vectors. *Oecologia.*, 190, 139-148.
- 729 Bedhomme, S., Lafforgue, G. & Elena, S.F. (2012). Multihost experimental evolution of a  
730 plant RNA virus reveals local adaptation and host-specific mutations. *Mol. Biol. Evol.*,  
731 29, 1481–1492.
- 732 Belliure, B., Janssen, A., Maris, P.C., Peters, D. & Sabelis, M.W. (2005). Herbivore  
733 arthropods benefit from vectoring plant viruses. *Ecol. Lett.*, 8, 70–79.
- 734 Betancourt, M., Escriu, F., Fraile, A. & García-Arenal, F. (2013). Virulence evolution of a  
735 generalist plant virus in a heterogeneous host system. *Evol. Appl.*, 6, 875–890.
- 736 Bosque-Pérez, N.A. & Eigenbrode, S.D. (2011). The influence of virus-induced changes in  
737 plants on aphid vectors: Insights from luteovirus pathosystems. *Virus Res.*, 159, 201–  
738 205.
- 739 Brault, V., Uzest, M., Monsion, B., Jacquot, E. & Blanc, S. (2010). Aphids as transport  
740 devices for plant viruses. *C. R. Biol.*, 333, 524–538.
- 741 Casteel, C., De Alwis, M., Bak, A., Dong, H., Steven, A.W. & Jander, G. (2015). Disruption of  
742 ethylene responses by Turnip mosaic virus mediates suppression of plant defense  
743 against the aphid vector, *Myzus persicae*. *Plant Physiol.*, 169, 209-218.
- 744 Chesnais, Q., Mauck, K.E., Bogaert, F., Bamière, A., Catterou, M., Spicher, F., *et al.* (2019).  
745 Virus effects on plant quality and vector behavior are species specific and do not depend  
746 on host physiological phenotype. *J. Pest Sci.* , 92, 791–804.

- 747 Davis, T.S., Bosque-Pérez, N.A., Foote, N.E., Magney, T. & Eigenbrode, S.D. (2015).  
748 Environmentally dependent host–pathogen and vector–pathogen interactions in the  
749 Barley yellow dwarf virus pathosystem. *J. Appl. Ecol.*, 52, 1392–1401.
- 750 Eigenbrode, S.D. & Bosque-Perez, N.A. (2016). Chemical ecology of aphid-transmitted plant  
751 viruses. In: *Vector-Mediated Transmission of Plant Pathogens* (ed. Brown, J.K.). The  
752 American Phytopathological Society, pp. 3–19.
- 753 Eigenbrode, S.D., Bosque-Pérez, N.A. & Davis, T.S. (2018). Insect-borne plant pathogens  
754 and their vectors: ecology, evolution, and complex interactions. *Annu. Rev. Entomol.*,  
755 63, 169–191.
- 756 Elena, S.F. (2016). Local adaptation of plant viruses: lessons from experimental evolution.  
757 *Mol. Ecol.*, 26, 1711-1719.
- 758 Fereres, A. (2016). Aphid behavior and the transmission of non-circulative viruses. *Vector-*  
759 *mediated transmission of plant pathogens*. APS Press, St. Paul, 31–45.
- 760 Fereres, A. & Moreno, A. (2009). Behavioural aspects influencing plant virus transmission by  
761 homopteran insects. *Virus Res.*, 141, 158–168.
- 762 García-Arenal, F. & Fraile, A. (2013). Trade-offs in host range evolution of plant viruses.  
763 *Plant Pathol.*, 62, 2–9.
- 764 Hedges, L.V. (1981). Distribution theory for glass's estimator of effect size and related  
765 estimators. *J. Educ. Behav. Stat.*, 6, 107–128.
- 766 Heil, M. (2016). Host manipulation by parasites: cases, patterns, and remaining doubts.  
767 *Frontiers in Ecology and Evolution*, 4, 80.
- 768 Hogenhout, S.A., Ammar, E.-D., Whitfield, A.E. & Redinbaugh, M.G. (2008). Insect vector  
769 interactions with persistently transmitted viruses. *Annu. Rev. Phytopathol.*, 46, 327–359.
- 770 Hothorn, T., Bretz, F. & Westfall, P. (2008). Simultaneous inference in general parametric  
771 models. *Biom. J.*, 50, 346–363.
- 772 Huwaldt, J.A. & Steinhorst, S. (2013). Plot digitizer. URL <http://plotdigitizer.sourceforge.net>.
- 773 Ingwell, L.L., Eigenbrode, S.D. & Bosque-Pérez, N.A. (2012). Plant viruses alter insect  
774 behavior to enhance their spread. *Sci. Rep.*, 2, 578.
- 775 Jeger, M.J., Chen, Z., Powell, G., Hodge, S. & van den Bosch, F. (2011). Interactions in a  
776 host plant-virus-vector-parasitoid system: modelling the consequences for virus  
777 transmission and disease dynamics. *Virus Res.*, 159, 183–193.
- 778 Kersch-Becker, M.F. & Thaler, J.S. (2013). Virus strains differentially induce plant  
779 susceptibility to aphid vectors and chewing herbivores. *Oecologia*, 174, 883–892.
- 780 Koricheva, J., Gurevitch, J. & Mengersen, K. (2013). *Handbook of Meta-analysis in Ecology*  
781 *and Evolution*. Princeton University Press.
- 782 Lafferty, K.D. & Shaw, J.C. (2013). Comparing mechanisms of host manipulation across host  
783 and parasite taxa. *J. Exp. Biol.*, 216, 56–66.

- 784 Lefèvre, T., Koella, J.C., Renaud, F., Hurd, H., Biron, D.G. & Thomas, F. (2006). New  
785 prospects for research on manipulation of insect vectors by pathogens. *PLoS Pathog.*, 2,  
786 e72.
- 787 Lefèvre, T. & Thomas, F. (2008). Behind the scene, something else is pulling the strings:  
788 Emphasizing parasitic manipulation in vector-borne diseases. *Infect. Genet. Evol.*, 8,  
789 504–519.
- 790 Madden, L.V., Jeger, M.J. & van den Bosch, F. (2000). A theoretical assessment of the  
791 effects of vector-virus transmission mechanism on plant virus disease epidemics.  
792 *Phytopathology*, 90, 576–594.
- 793 Malmstrom, C.M., Melcher, U. & Bosque-Pérez, N.A. (2011). The expanding field of plant  
794 virus ecology: historical foundations, knowledge gaps, and research directions. *Virus*  
795 *Res.*, 159, 84–94.
- 796 Martin, B., Collar, J.L., Tjallingii, W.F. & Fereres, A. (1997). Intracellular ingestion and  
797 salivation by aphids may cause the acquisition and inoculation of non-persistently  
798 transmitted plant viruses. *J. Gen. Virol.*, 78, 2701–2705.
- 799 Mauck, K.E., Bosque-Pérez, N.A., Eigenbrode, S.D., De Moraes, C.M. & Mescher, M.C.  
800 (2012). Transmission mechanisms shape pathogen effects on host-vector interactions:  
801 evidence from plant viruses. *Funct. Ecol.*, 26, 1162–1175.
- 802 Mauck, K.E., Chesnais, Q. & Shapiro, L.R. (2018). Evolutionary determinants of host and  
803 vector manipulation by plant viruses. *Adv. Virus Res.*, 101, 189–250.
- 804 Mauck, K.E., De Moraes, C.M. & Mescher, M.C. (2010). Deceptive chemical signals induced  
805 by a plant virus attract insect vectors to inferior hosts. *Proceedings of the National*  
806 *Academy of Sciences*, 107, 3600–3605.
- 807 Mauck, K.E., De Moraes, C.M. & Mescher, M.C. (2014a). Biochemical and physiological  
808 mechanisms underlying effects of Cucumber mosaic virus on host-plant traits that  
809 mediate transmission by aphid vectors. *Plant Cell Environ.*, 37, 1427–1439.
- 810 Mauck, K.E., De Moraes, C.M. & Mescher, M.C. (2014b). Evidence of Local Adaptation in  
811 Plant Virus Effects on Host–Vector Interactions. *Integr. Comp. Biol.*, 54, 193–209.
- 812 Mauck, K.E., De Moraes, C.M. & Mescher, M.C. (2016). Effects of pathogens on sensory-  
813 mediated interactions between plants and insect vectors. *Curr. Opin. Plant Biol.*, 32, 53–  
814 61.
- 815 Mauck, K.E., Kenney, J. & Chesnais, Q. (2019). Progress and challenges in identifying  
816 molecular mechanisms underlying host and vector manipulation by plant viruses.  
817 *Current Opinion in Insect Science*, 33, 7–18.
- 818 Mauck, K.E., Smyers, E., De Moraes, C.M. & Mescher, M.C. (2015). Virus infection  
819 influences host plant interactions with non-vector herbivores and predators. *Funct. Ecol.*,  
820 29, 662–673.



- 821 McElhany, P., Real, L.A. & Power, A.G. (1995). Vector preference and disease dynamics: A  
822 study of barley yellow dwarf virus. *Ecology*, 76, 444–457.
- 823 Mondal, S., Wenninger, E.J., Hutchinson, P.J.S., Weibe, M.A., Eigenbrode, S.D. & Bosque-  
824 Pérez, N.A. (2016). Contribution of non-colonizing aphids to *Potato virus Y* prevalence in  
825 potato in Idaho. *Environ. Entomol.*, 45, 1445–1462.
- 826 Moreno-Delafuente, A., Garzo, E., Moreno, A. & Fereres, A. (2013). A plant virus manipulates  
827 the behavior of its whitefly vector to enhance its transmission efficiency and spread.  
828 *PLoS One*, 8, e61543.
- 829 Nault, L.R. (1997). Arthropod transmission of plant viruses: a new synthesis. *Ann. Entomol.*  
830 *Soc. Am.*, 90, 521–541.
- 831 Ng, J.C.K. & Falk, B.W. (2006). Virus-vector interactions mediating nonpersistent and  
832 semipersistent transmission of plant viruses. *Annu. Rev. Phytopathol.*, 44, 183–212.
- 833 Ng, J.C.K. & Zhou, J.S. (2015). Insect vector-plant virus interactions associated with non-  
834 circulative, semi-persistent transmission: current perspectives and future challenges.  
835 *Curr. Opin. Virol.*, 15, 48–55.
- 836 Ngumbi, E., Eigenbrode, S.D., Bosque-Pérez, N.A., Ding, H. & Rodriguez, A. (2007). *Myzus*  
837 *persicae* is arrested more by blends than by individual compounds elevated in  
838 headspace of PLRV-infected potato. *J. Chem. Ecol.*, 33, 1733–1747.
- 839 Patarroyo, C., Laliberté, J.-F. & Zheng, H. (2012). Hijack it, change it: how do plant viruses  
840 utilize the host secretory pathway for efficient viral replication and spread? *Front. Plant*  
841 *Sci.*, 3, 308.
- 842 Pazhouhandeh, M., Dieterle, M., Marrocco, K., Lechner, E., Berry, B., Brault, V., *et al.*  
843 (2006). F-box-like domain in the polerovirus protein P0 is required for silencing  
844 suppressor function. *Proc. Natl. Acad. Sci. U. S. A.*, 103, 1994–1999.
- 845 Peñafior, M.F.G.V., Mauck, K.E., Alves, K.J., De Moraes, C.M. & Mescher, M.C. (2016).  
846 Effects of single and mixed infections of bean pod mottle virus and soybean mosaic  
847 virus on host plant chemistry and host-vector interactions. *Funct. Ecol.*, 30, 1648-1659.
- 848 Poulin, R. (2010). Parasite manipulation of host behavior: an update and frequently asked  
849 questions. *Adv. Stud. Behav.*, 41, 151–186.
- 850 Rajabaskar, D., Bosque-Pérez, N.A. & Eigenbrode, S.D. (2014). Preference by a virus vector  
851 for infected plants is reversed after virus acquisition. *Virus Res.*, 186, 32–37.
- 852 Rojas, M.R., Maliano, M.R., de Souza, J.O., Vasquez-Mayorga, M., de Macedo, M.A., Ham,  
853 B.-K., *et al.* (2016). Cell-to-cell movement of plant viruses: a diversity of mechanisms  
854 and strategies. In: *Current Research Topics in Plant Virology* (eds. Wang, A. & Zhou,  
855 X.). Springer International Publishing, Cham, pp. 113–152.
- 856 Roosien, B.K., Gomulkiewicz, R., Ingwell, L.L., Bosque-Pérez, N.A., Rajabaskar, D. &  
857 Eigenbrode, S.D. (2013). Conditional vector preference aids the spread of plant

- 858 pathogens: results from a model. *Environ. Entomol.*, 42, 1299–1308.
- 859 Rosenthal, R. (1979). The file drawer problem and tolerance for null results. *Psychol. Bull.*,
- 860 86, 638.
- 861 Rydén, K., Brishammar, S. & Sigvald, R. (1983). The infection pressure of *Potato virus Y<sup>o</sup>*
- 862 and the occurrence of winged aphids in potato fields in Sweden. *Potato Res.*, 26, 229–
- 863 235.
- 864 Shaw, A.K., Igoe, M., Power, A.G., Bosque-Pérez, N.A. & Peace, A. (2019). Modeling
- 865 approach influences dynamics of a vector-borne pathogen system. *Bull. Math. Biol.*, 6,
- 866 2011-2028.
- 867 Shaw, A.K., Peace, A., Power, A.G. & Bosque-Pérez, N.A. (2017). Vector population growth
- 868 and condition-dependent movement drive the spread of plant pathogens. *Ecology*, 98,
- 869 2145–2157.
- 870 Sigvald, R. (1989). Relationship between aphid occurrence and spread of potato virus Y<sup>o</sup>
- 871 (PVY<sup>o</sup>) in field experiments in southern Sweden. *J. Appl. Entomol.*, 108, 35–43.
- 872 Sisterson, M.S. (2008). Effects of insect-vector preference for healthy or infected plants on
- 873 pathogen spread: insights from a model. *J. Econ. Entomol.*, 101, 1–8.
- 874 Stafford, C.A., Walker, G.P. & Ullman, D.E. (2011). Infection with a plant virus modifies
- 875 vector feeding behavior. *Proc. Natl. Acad. Sci. U. S. A.*, 108, 9350–9355.
- 876 Thomas, F., Adamo, S. & Moore, J. (2005). Parasitic manipulation: where are we and where
- 877 should we go? *Behav. Processes*, 68, 185–199.
- 878 Viechtbauer, W. (2010). Conducting meta-analyses in R with the metafor package. *J. Stat.*
- 879 *Softw.*, 36.
- 880 Wang, R.Y. & Ghabrial, S.A. (2002). Effect of aphid behavior on efficiency of transmission of
- 881 *Soybean mosaic virus* by the soybean-colonizing aphid, *Aphis glycines*. *Plant Dis.*, 86,
- 882 1260–1264.
- 883 Yang, Z. & Li, Y. (2018). Dissection of RNAi-based antiviral immunity in plants. *Curr. Opin.*
- 884 *Viro.*, 32, 88–99.
- 885
